# Supplementary material for: High genetic contribution to anterior cruciate ligament rupture: Heritability ~69%
Source: HighWire-hosted journal article supplement (doi:10.1136/bjsports-2020-102392), 2020-12-07
Supplement: bjsports-2020-102392supp001_data_supplement.pdf [file bjsports-2020-102392supp001_data_supplement.pdf]

**Supplementary Appendix for the paper**

The genetic contribution to anterior cruciate ligament rupture

by Magnusson et al., 2020

**Contents:**

- Figure S1: Number of twins with the included ICD-9 codes (844C) and ICD-10 codes (S83.7, S83.5, S83.5R, S83.5S, S83.5X). Page 2.
- Table S1: Model fit and variance components estimates for the classical twin model for having a diagnostic code of cruciate ligament injury in the Swedish Twin Registry. Page 3.

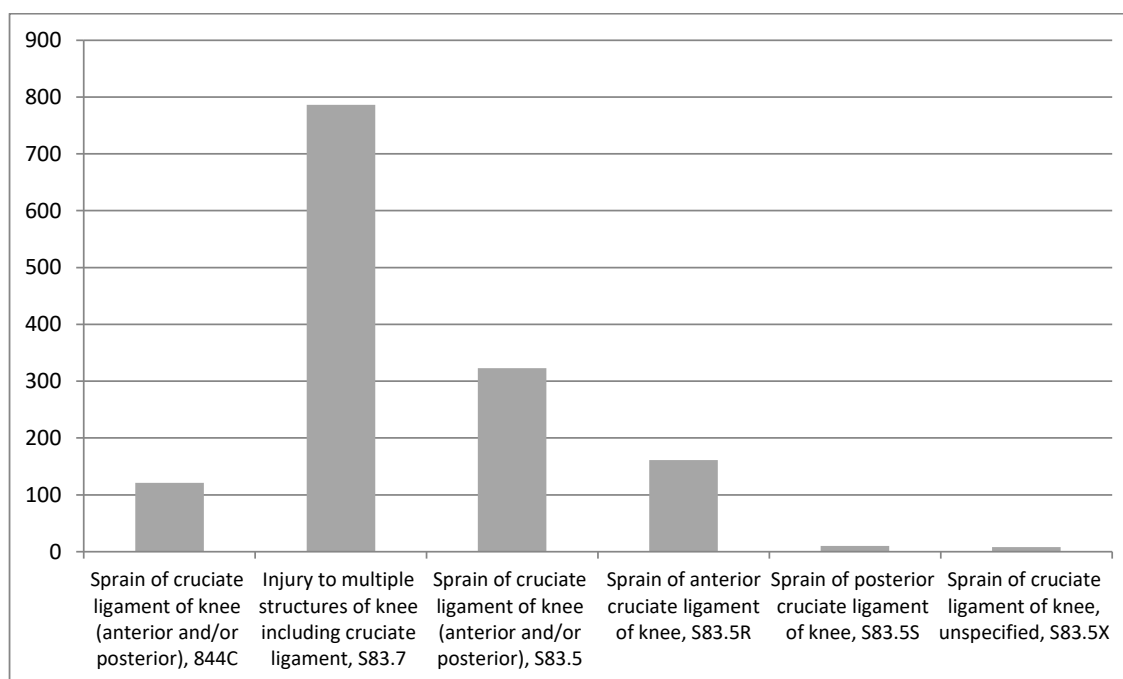

**Figure S1.** Number of twins with the included ICD-9 codes (844C) and ICD-10 codes (S83.7, S83.5, S83.5R, S83.5S, S83.5X).

**Table S1.** Model fit and variance components estimates for the classical twin model for having a diagnostic code of cruciate ligament injury in the Swedish Twin Registry.

| Variance components estimates |                  |            |                         |                         |                |
|-------------------------------|------------------|------------|-------------------------|-------------------------|----------------|
| Model                         | A (95% CI)       | C (95% CI) | D (95% CI)              | E (95% CI)              | AIC            |
| ACE                           | 0.64 (0.40-0.88) | 0          |                         | 0.36 (0.12-0.60)        | 3959.35        |
| <b>ADE</b>                    | <b>0</b>         |            | <b>0.69 (0.47-0.91)</b> | <b>0.31 (0.09-0.53)</b> | <b>3957.35</b> |
| AE                            | 0.64 (0.40-0.88) |            |                         | 0.36 (0.12-0.60)        | 3958.11        |

A: Additive genetic factors, C: Common environmental factors, D: Dominant genetic factors, E: Unique environmental factors. Models compared by AIC - Akaike Information Criteria (smaller value indicates better fit).
